# Supplementary material for: Soil carbon mineralization in response to nitrogen enrichment in surface and subsurface layers in two land use types
Source: PeerJ. 2019 Jul 8;7:e7130. doi: 10.7717/peerj.7130 (PMC6622155; doi:10.7717/peerj.7130)
Supplement: Data S1 — Each soil depth has 3 replicates. [file peerj-07-7130-s001.xls]

## Sheet: Calcul_Humidity
nom_scq	Soil name	Sr #	Depth (cm)	Soil abbreviation	rep	Tare	FW	Tare+DW	%HUM	Mean	SD	Wdry soil	Soil to be weighted (for 20g dry soil)			Tare waterPot.	FW WaterPot.	Tare+DW WaterPot.	% Water Potential	Mean	S.D.	Water present in Fsoil	Water required for Dsoil	at 60% WHC	Water already present	Water to be added	Nutrient solution added (ml)	Difference water	at 30% Humidiy	Water at 60%
Thèse Nazia_colimitation	FSD	1	0-20	S1D1	1	48.68	10.39	57.56	17.0045	13.1918	2.70763	20	22.6384	50	56.5959	51.05	17.71	63.89	37.9283	38.7411	0.793099	2.63836	7.74822	4.64893	2.63836	2.01057	1	1.01057	1.00529	0.0052873
Thèse Nazia_colimitation	FSD	2	0-20	S1D1	2	54.33	10.21	63.53	10.9783							47.98	17.76	60.71	39.513
Thèse Nazia_colimitation	FSD	3	0-20	S1D1	3	45.3	10.3	54.53	11.5926							51.73	17.32	64.21	38.7821
Thèse Nazia_colimitation	FSD	4	20-40	S1D2	1	53.45	10.43	62.57	14.364	11.8464	0.543938		22.3693		55.9232	50.27	17.42	63.63	30.3892	33.4617	2.72134	2.36928	6.69234	4.01541	2.36928	1.64612		0.646124	0.823062	-0.176938
Thèse Nazia_colimitation	FSD	5	20-40	S1D2	2	50.9	10.25	60.02	12.3904							50.61	18.6	64.33	35.5685
Thèse Nazia_colimitation	FSD	6	20-40	S1D2	3	49.54	10.34	58.83	11.3025							46.1	18.43	59.81	34.4274
Thèse Nazia_colimitation	FSD	7	40-60	S1D3	1	56.72	10.74	66.13	14.1339	12.1629	0.391704		22.4326		56.0814	38.47	19.17	62.75	-21.0461	33.8946	0.101835	2.43258	6.77891	4.06735	2.43258	1.63477		0.634771	0.817385	-0.182615
Thèse Nazia_colimitation	FSD	8	40-60	S1D3	2	48.12	10.16	57.21	11.7712							49.15	20.06	64.14	33.8225
Thèse Nazia_colimitation	FSD	9	40-60	S1D3	3	50.6	10.31	59.76	12.5546							50.41	17.63	63.57	33.9666
Thèse Nazia_colimitation	LHR	10	0-20	S2D1	1	48.72	10.28	58.24	7.98319	7.07657	0.739602		21.4153		53.5383	50.8	20.11	64.16	50.524	49.2189	1.26957	1.41531	9.84378	5.90627	1.41531	4.49095		3.49095	2.24548	1.24548
Thèse Nazia_colimitation	LHR	11	0-20	S2D1	2	44.51	10.14	53.98	7.07497							49.24	19.86	62.66	47.9881
Thèse Nazia_colimitation	LHR	12	0-20	S2D1	3	48.28	10.15	57.84	6.17155							53.34	19.18	66.2	49.1446
Thèse Nazia_colimitation	LHR	13	20-40	S2D2	1	51.69	10.3	61.15	8.87949	8.18729	0.4931		21.6375		54.0936	51.57	19.5	64.97	45.5224	44.9643	0.585137	1.63746	8.99286	5.39572	1.63746	3.75826		2.75826	1.87913	0.879129
Thèse Nazia_colimitation	LHR	14	20-40	S2D2	2	47.77	10.09	57.12	7.91444							49.49	19.82	63.22	44.3554
Thèse Nazia_colimitation	LHR	15	20-40	S2D2	3	51.29	10.96	61.46	7.76794							51.73	19.2	64.97	45.0151
Thèse Nazia_colimitation	LHR	16	40-60	S2D3	1	52.24	10.22	61.55	9.77444	6.62308	0.148262		21.3246		53.3115	51.42	18.38	64.02	45.873	46.6905	1.40322	1.32462	9.33811	5.60286	1.32462	4.27825		3.27825	2.13912	1.13912
Thèse Nazia_colimitation	LHR	17	40-60	S2D3	2	50.32	10.88	60.51	6.77134							51.62	17.56	63.46	48.3108
Thèse Nazia_colimitation	LHR	18	40-60	S2D3	3	50.05	10.36	59.78	6.47482							57.49	18.98	70.5	45.8878
Thèse Nazia_colimitation
Thèse Nazia_colimitation

## Sheet: Calcul C
Soil name	Sr #	Depth (cm)	Soil abbreviation	rep	Initial Vol.	Final Vol.	Vol. Used	Mean	SD	OC % (0.9g)	OC % (1.0 g)	Mean	SD	OC (g/kg soil)	Mean	SD	OM (%)	Mean	SD	OM (g/kg soil)	Mean	SD	pH	Mean	SD
			Blank 1	1	0	21.5	21.5	21.4	0.294392
			Blank 2	2	0	21	21
			Blank 3	3	21	42.7	21.7
FSD	1	0-20	S1D1	1	21.5	41	19.5	20	0.707107	0.384735	0.346262	0.346262	0	3.46262	3.46262	0	0.59557	0.59557	0	5.9557	5.9557	0	8.122	8.26067	0.206802	0.9 at the end is the hypothetical values of dry soil from 1 g fresh soil. You may give the original value from your calculations of humidity.
FSD	2	0-20	S1D1	2	0	21	21			0.0809969	0.0728972	0.346262		0.728972			0.125383			1.25383			8.107
FSD	3	0-20	S1D1	3	0	19.5	19.5			0.384735	0.346262			3.46262			0.59557			5.9557			8.553
FSD	4	20-40	S1D2	1	0	25.2	25.2	22.1667	2.14838	-0.76947	-0.692523	0.136682	0.0273364	-6.92523	1.36682	0.273364	-1.19114	0.235093	0.0470187	-11.9114	2.35093	0.470187	8.552	8.81567	0.227889
FSD	5	20-40	S1D2	2	25.2	46	20.8			0.121495	0.109346			1.09346			0.188075			1.88075			8.787
FSD	6	20-40	S1D2	3	0	20.5	20.5			0.182243	0.164019			1.64019			0.282112			2.82112			9.108			(10*(1-mLs/mLb)*0.003*100*1.3)/0.9
FSD	7	40-60	S1D3	1	20.5	42.1	21.6	21.3333	0.249444	-0.0404984	-0.0364486	0.0364486	0.0364486	-0.364486	0.364486	0.364486	-0.0626916	0.0626916	0.0626916	-0.626916	0.626916	0.626916	8.589	8.326	0.188886
FSD	8	40-60	S1D3	2	0	21	21			0.0809969	0.0728972			0.728972			0.125383			1.25383			8.154
FSD	9	40-60	S1D3	3	21	42.4	21.4			4.81097e-16	4.32987e-16			4.32987e-15			7.44738e-16			7.44738e-15			8.235
LHR	10	0-20	S2D1	1	0	17	17	16.6667	0.928559	0.890966	0.801869	0.747196	0.0546729	8.01869	7.47196	0.546729	1.37921	1.4837	0.291064	13.7921	12.8518	0.940374	8.203	8.091	0.112
LHR	11	0-20	S2D1	2	17	34.6	17.6			0.76947	0.692523			6.92523			1.19114			11.9114			7.979
LHR	12	0-20	S2D1	3	34.6	50	15.4			1.21495	1.09346			10.9346			1.88075			18.8075
LHR	13	20-40	S2D2	1	0	19.4	19.4	19.3333	3.51125	0.404984	0.364486	0.412243	0.047757	3.64486	4.12243	0.47757	0.626916	0.709058	0.0821421	6.26916	7.09058	0.821421	8.488	8.39533	0.160915
LHR	14	20-40	S2D2	2	19.4	43	23.6			-0.445483	-0.400935			-4.00935			-0.689607			-6.89607			8.529
LHR	15	20-40	S2D2	3	35	50	15			1.29595	0.46			4.6			0.7912			7.912			8.169
LHR	16	40-60	S2D3	1	8	28	20	20.0667	0.0942809	0.283489	0.25514	0.242991	0.017182	2.5514	2.42991	0.17182	0.438841	0.417944	0.0295531	4.38841	4.17944	0.295531	8.532	8.38867	0.158972
LHR	17	40-60	S2D3	2	28	48.2	20.2			0.242991	0.218692			2.18692			0.37615			3.7615			8.467
LHR	18	40-60	S2D3	3	21.1	41.1	20			0.283489	0.25514			2.5514			0.438841			4.38841			8.167
																																					12

## Sheet: Prop
Site	Depth	WHC	SOC	pH	Sand	Clay	Silt
S1	D1	37.9283	8.01869	8.122	93.7	2.42	3.88
S1	D1	39.513	6.92523	8.107	93.7	2.42	3.88
S1	D1	38.7821	7.47196	8.553	93.7	2.42	3.88
S1	D2	30.3892	3.64486	8.552	95.58	2.42	2
S1	D2	35.5685	4.12243	8.787	95.58	2.42	2
S1	D2	34.4274	4.6	9.108	95.58	2.42	2
S1	D3	34.998	2.5514	8.589	93.64	2.36	4
S1	D3	33.8225	2.18692	8.154	93.64	2.36	4
S1	D3	33.9666	2.5514	8.235	93.64	2.36	4
S2	D1	50.524	3.46262	8.203	93.52	2.48	4
S2	D1	47.9881	3.46262	7.979	93.52	2.48	4
S2	D1	49.1446	3.46262	8.091	93.52	2.48	4
S2	D2	45.5224	1.36682	8.488	93.52	2.48	4
S2	D2	44.3554	1.09346	8.529	93.52	2.48	4
S2	D2	45.0151	1.64019	8.169	93.52	2.48	4
S2	D3	45.873	0.364486	8.532	93.46	2.54	4
S2	D3	48.3108	0.728972	8.467	93.46	2.54	4
S2	D3	45.8878	4.32987e-15	8.167	93.46	2.54	4
