# Supplementary material for: Soil carbon mineralization in response to nitrogen enrichment in surface and subsurface layers in two land use types
Source: PeerJ. 2019 Jul 8;7:e7130. doi: 10.7717/peerj.7130 (PMC6622155; doi:10.7717/peerj.7130)
Supplement: Data S2 — Each soil depth has 3 replicates. [file peerj-07-7130-s002.xls]

## Sheet: C-CO2_V1
Date=	2016-05-01					Calculation formula =		((C-S)*2.2*100)/(SW*%dm) =mg CO2.g-1 dm.24 h						control	blank
				Conversion factor	2.2			C= mean volume of HCl consumed by controls (ml)						kl blank rakhein	jar mein NaOh rakhen
				Soil weight	20	g (Oven dry)		S= mean volume of HCl consumed by samples (ml)						titrate karen
								2.2=Conversion factor (1 ml of 0.1 M HCl corresponds to 2.2 mg CO2)						Control or treated
								SW= Initial soil weight (g)
				Day 1				100.%-1dm=factor for soil dry matter				Day 2				Day 3					Day 5					Day 6
Soil name	Sr #	Depth	Name	Init Vol.(May 12)	Final Vol. (May 12)	Vol.Used	Mean	C-S	Mean	SD	Mean	Init Vol.(May 13)	Final Vol. (May 13)	Diff	Mean	Init Vol.(May 14)	Final Vol. (May 14)	Difference	Mean	C-S	Init Vol.(M16)	Final Vol. (May 16)	Difference	Mean		Init Vol.(M17)	Final Vol. (May 17)	Difference	Mean	Mean		Init Vol.(May 18)	Final Vol. (May 18)	Difference	Mean	C-S		Init Vol.(May 19th)	Final Vol. (May 19th)	Difference	Blank	Mean			Init Vol.(May 20th)	Final Vol. (May 20th)	Difference	Blank	Mean
	1	NA	Blank 1				13								13				13					15											13			0	7.2	7.2	8.33333				0	6.9	6.9	7.56667
	2	NA	Blank 2																																			7.2	15.2	8					6.9	14.6	7.7
	3	NA	Blank 3																																			15.2	25	9.8					14.8	22.9	8.1
FSD	4	0-20	Control S1D1R1	0	7.4	7.4		5.6			8.26667	0	9.4	9.4	3.6	17.4	26.2	8.8		4.2	15.2	25.4	10.2		4.8	0	10.8	10.8		10.0667		37.4	46.7	9.3		3.7		0	10.1	10.1		9.63333			22.9	31.7	8.8		8.63333
FSD	5	0-20	Control S1D1R2	7.4	16.1	8.7		4.3				9.4	17.9	8.5	4.5	17.4	25.4	8		5	25.4	35.4	10		5	39.2	48.6	9.4				31.2	40	8.8		4.2		10.1	19.6	9.5					31.7	40.2	8.5
FSD	6	0-20	Control S1D1R3	16.1	24.8	8.7		4.3				17.9	27.2	9.3	3.7	26.5	35.2	8.7		4.3	0	9.1	9.1		5.9	21.7	31.7	10				28	37.4	9.4		3.6		38.5	47.8	9.3					40.2	48.8	8.6
FSD	7	20-40	Control S1D2R1	24.8	33.6	8.8		4.2			8.6	27.2	36.2	9	4	35.9	44.5	8.6		4.4	0	11.1	11.1		3.9	23.4	33.1	9.7		11		20.1	31.2	11.1		1.9		19.6	29	9.4		9.16667			0	8.9	8.9		8.9
FSD	8	20-40	Control S1D2R2	33.6	42.1	8.5		4.5				36.2	45.6	9.4	3.6	19	27.1	8.1		4.9	9.1	20.5	11.4		3.6	10.9	23.4	12.5				18	28	10		3		18.6	28	9.4					8.9	17.8	8.9
FSD	9	20-40	Control S1D2R3	0	8.5	8.5		4.5				0	9.1	9.1	3.9	8.6	17.4	8.8		4.2	35.4	45.6	10.2		4.8	12.9	23.7	10.8				29.4	39.5	10.1		2.9		9.2	17.9	8.7					17.8	26.7	8.9
FSD	10	40-60	Control S1D3R1	8.5	17.4	8.9		4.1			9.1	9.1	19	9.9	3.1	19.2	28.5	9.3		3.7	20.7	31.1	10.4		4.6	33.1	43.2	10.1		10.9667		10.5	20.4	9.9		3.1		8.9	19.7	10.8		10.1333			26.7	35.7	9		8.66667
FSD	11	40-60	Control S1D3R2	17.4	26.5	9.1		3.9				19	28.5	9.5	3.5	0	9.9	9.9		3.1	31.1	41.6	10.5		4.5	0	12.4	12.4				20.4	29.4	9		4		28	37.9	9.9					35.7	44.3	8.6
FSD	12	40-60	Control S1D3R3	26.5	35.8	9.3		3.7				28.5	38.1	9.6	3.4	35.5	43.4	7.9		5.1	10	21	11		4	34.9	45.3	10.4				0	10.5	10.5		2.5		8.9	18.6	9.7					0	8.4	8.4
LHR	13	0-20	Control S2D1R1	35.8	44.7	8.9		4.1			8.86667	38.1	45.1	7	6	0	8.9	8.9		4.1	31.5	41.2	9.7		5.3	10.3	20.1	9.8		9.7		0	9.6	9.6		3.4		0	9.2	9.2		9.43333			8.5	17.5	9		8.56667
LHR	14	0-20	Control S2D1R2	0	8.9	8.9		4.1				0	9.5	9.5	3.5	28.5	37.2	8.7		4.3	21	31.5	10.5		4.5	20.1	29.6	9.5				21	31.1	10.1		2.9		29.6	39.1	9.5					17.5	26	8.5
LHR	15	0-20	Control S2D1R3	8.9	17.7	8.8		4.2				9.5	19	9.5	3.5	8.9	17.4	8.5		4.5	31.5	41.8	10.3		4.7	40.2	50	9.8				31.5	40.2	8.7		4.3		38	47.6	9.6					26	34.2	8.2
LHR	16	20-40	Control S2D2R1	17.7	27.8	10.1		2.9			9.1	19	29.5	10.5	2.5	0	8.9	8.9		4.1	0	10	10		5	29.6	39.2	9.6		10.3		0.2	11.5	11.3		1.7		18	29	11		9.8			34.2	42.6	8.4		8.1
LHR	17	20-40	Control S2D2R2	27.8	36.7	8.9		4.1				29.5	39	9.5	3.5	0	8.5	8.5		4.5	20.3	31.5	11.2		3.8	0	10.2	10.2				11.7	22.3	10.6		2.4		29	38.5	9.5					0	8.5	8.5
LHR	18	20-40	Control S2D21R3	37.7	46	8.3		4.7				39	49	10	3	10	19.2	9.2		3.8	26.4	36.8	10.4		4.6	23.7	34.8	11.1				22.3	31.5	9.2		3.8		0	8.9	8.9					8.5	15.9	7.4
LHR	19	40-60	Control S2D3R1	0	9.5	9.5		3.5			9.16667	0	9.4	9.4	3.6	27.1	36	8.9		4.1	36.8	47.1	10.3		4.7	10.8	21.7	10.9		10.4333		0	9.4	9.4		3.6		0	9.6	9.6		9.9			17	25.5	8.5		8.46667
LHR	20	40-60	Control S2D3R2	9.5	18.4	8.9		4.1				9.4	19	9.6	3.4	8.5	16.6	8.1		4.9	0	10	10		5	31.7	41.6	9.9				9.4	18	8.6		4.4		29.1	39.3	10.2					25.6	34	8.4
LHR	21	40-60	Control S2D3R3	18.4	27.5	9.1		3.9				19	27.5	8.5	4.5	26.2	35.5	9.3		3.7	10	20	10		5	0	10.5	10.5				9.6	20.1	10.5		2.5		19.7	29.6	9.9					34	42.5	8.5
FSD	22	0-20	S1D1R1 (N1)	19	28	9		4			9.16667	0	7.2	7.2	5.8	0	9.4	9.4		3.6	39.7	49.1	9.4		5.6	0	8.1	8.1		9.46667		0	8.2	8.2		4.8		0	10	10		9.56667			2.5	11.3	8.8		8.56667
FSD	23	0-20	S1D1R2 (N1)	38.2	47.3	9.1		3.9				7.2	16.2	9	4	18.5	26.2	7.7		5.3	11.5	21.2	9.7		5.3	8.1	19.1	11				18.2	28.5	10.3		2.7		18.7	27.7	9					11.4	20	8.6
FSD	24	0-20	S1D1R3 (N1)	36.9	46.3	9.4		3.6				16.2	25.5	9.3	3.7	26.6	35.4	8.8		4.2	26.7	36.5	9.8		5.2	19.1	28.4	9.3				8.2	18.2	10		3		19.4	29.1	9.7					20.1	28.4	8.3
FSD	25	20-40	S1D2R1 (N1)	9.1	18.5	9.4		3.6			9.63333	25.2	35.1	9.9	3.1	0	10.5	10.5		2.5	29.8	39.7	9.9		5.1	10.2	19.5	9.3		9.93333		31.8	43.1	11.3		1.7		19.3	29	9.7		9.6			28.4	37.1	8.7		8.6
FSD	26	20-40	S1D2R2 (N1)	18	28.5	10.5		2.5				35.1	44.6	9.5	3.5	31.5	41.4	9.9		3.1	21.2	30.9	9.7		5.3	25.8	36.8	11				11	22.1	11.1		1.9		27.7	37.4	9.7					37.2	46	8.8
FSD	27	20-40	S1D2R3 (N1)	27.9	36.9	9		4				0	10	10	3	20.2	31	10.8		2.2	10.2	20	9.8		5.2	36.8	46.3	9.5				10.5	21.2	10.7		2.3		38.7	48.1	9.4					0.1	8.4	8.3
FSD	28	40-60	S1D3R1 (N1)	19	28	9		4			9.16667	10	19.2	9.2	3.8	32.6	42.2	9.6		3.4	19.9	29.8	9.9		5.1	10.6	22.2	11.6		10.6667		0	10.9	10.9		2.1		29.1	38.7	9.6		9.13333			8.5	17.2	8.7		8.6
FSD	29	40-60	S1D3R2 (N1)	18.5	27.9	9.4		3.6				19.2	29.5	10.3	2.7	21.6	32.5	10.9		2.1	30.9	40.6	9.7		5.3	0	10.6	10.6				11.6	23.3	11.7		1.3		17.9	26	8.1					17.2	25.8	8.6
FSD	30	40-60	S1D3R3 (N1)	0	9.1	9.1		3.9				29.5	39.3	9.8	3.2	11.2	21.6	10.4		2.6	0	10.2	10.2		4.8	28.4	38.2	9.8				23.4	33.8	10.4		2.6		10.7	20.4	9.7					25.8	34.3	8.5
FSD	31	0-20	S1D1R1 (N2)	9.6	19	9.4		3.6			9.43333	3.5	13.2	9.7	3.3	0	8.9	8.9		4.1	40.6	50	9.4		5.6	16.2	25.8	9.6		10.3		0	11.6	11.6		1.4		26	35.5	9.5		9.33333			0	8.8	8.8		8.7
FSD	32	0-20	S1D1R2 (N2)	37.4	46.9	9.5		3.5				14	23.8	9.8	3.2	8.9	18.5	9.6		3.4	0	11.5	11.5		3.5	5.4	16.2	10.8				0	11.6	11.6		1.4		29.3	38.8	9.5					8.8	17.5	8.7
FSD	33	0-20	S1D1R3 (N2)	9.1	18.5	9.4		3.6				27.8	37.8	10	3	40.2	50	9.8		3.2	36.5	46.2	9.7		5.3	0	10.5	10.5				21.6	32.4	10.8		2.2		37.5	46.5	9					17.6	26.2	8.6
FSD	34	20-40	S1D2R1 (N2)	18.5	28	9.5		3.5			9.36667	23.8	33.4	9.6	3.4	22.2	31.5	9.3		3.7	10.2	19.9	9.7		5.3	32.3	43.6	11.3		10.3333		11.6	21.6	10		3		10	19.3	9.3		9.6			26.2	35	8.8		8.56667
FSD	35	20-40	S1D2R2 (N2)	0	9.6	9.6		3.4				8	18.1	10.1	2.9	12.1	22.2	10.1		2.9	0	9	9		6	38.2	48.4	10.2				32.4	42.9	10.5		2.5		0	10.3	10.3					35.1	43.8	8.7
FSD	36	20-40	S1D2R3 (N2)	28	37	9		4				37	46	9	4	31.4	41.6	10.2		2.8	28	46	18		-3	10.5	20	9.5				33.8	44.2	10.4		2.6		9.5	18.7	9.2					0.7	8.9	8.2
FSD	37	40-60	S1D3R1 (N2)	9.1	18.5	9.4		3.6			9.43333	33.6	43.4	9.8	3.2	9.4	20.2	10.8		2.2	0	10.2	10.2		4.8	20.1	31	10.9		10.4		21.2	31.8	10.6		2.4		0	9.5	9.5		9.4			0	8.8	8.8		8.66667
FSD	38	40-60	S1D3R2 (N2)	18.5	28	9.5		3.5				18.1	27.8	9.7	3.3	0	9.9	9.9		3.1	9	18.1	9.1		5.9	22.2	32.3	10.1				0	10.5	10.5		2.5		35.5	45.3	9.8					8.8	17.4	8.6
FSD	39	40-60	S1D3R3 (N2)	28	37.4	9.4		3.6				37.8	47.1	9.3	3.7	35.6	45.6	10		3	NA	NA	NA		#VALUE!	0	10.2	10.2				21.1	32.5	11.4		1.6		20.4	29.3	8.9					17.4	26	8.6
LHR	40	0-20	S2D1R1 (N1)	11.1	22.2	11.1		1.9			10.4	0	10.4	10.4	2.6	0	9.4	9.4		3.6	0	8.5	8.5		6.5	19.2	27.2	8		9.1		18.6	27.4	8.8		4.2		9.3	18	8.7		8.9			26	34.3	8.3		8.43333
LHR	41	0-20	S2D1R2 (N1)	0	9.8	9.8		3.2				10.4	23	12.6	0.4	9.4	20.1	10.7		2.3	8.5	17.8	9.3		5.7	26.8	36.3	9.5				20.6	30.2	9.6		3.4		28.7	37.6	8.9					34.3	43	8.7
LHR	42	0-20	S2D1R3 (N1)	11.6	21.9	10.3		2.7				23	31.4	8.4	4.6	20.1	29.6	9.5		3.5	31.4	40.6	9.2		5.8	0	9.8	9.8				11	20.6	9.6		3.4		18	27.1	9.1					0.8	9.1	8.3
LHR	43	20-40	S2D2R1 (N1)	21.9	31.8	9.9		3.1			10.1333	38.5	49.5	11	2	29.6	37.8	8.2		4.8	22.8	31.4	8.6		6.4	0	9	9		9.5		0	10.7	10.7		2.3		27.1	36	8.9		9.03333			9.1	17.6	8.5		8.83333
LHR	44	20-40	S2D2R2 (N1)	9.8	19.8	10		3				31.4	42.7	11.3	1.7	37.8	47.7	9.9		3.1	20	29	9		6	19.1	29.2	10.1				10.7	20.9	10.2		2.8		0	8.9	8.9					17.6	26.8	9.2
LHR	45	20-40	S2D21R3 (N1)	11.7	22.2	10.5		2.5				0	11.6	11.6	1.4	0	9.6	9.6		3.4	13.8	22.8	9		6	9.8	19.2	9.4				0	9.3	9.3		3.7		0	9.3	9.3					26.8	35.6	8.8
LHR	46	40-60	S2D3R1 (N1)	22.2	32.4	10.2		2.8			9.66667	28	38	10	3	9.6	19.4	9.8		3.2	0	8.4	8.4		6.6	38.5	48.9	10.4		9.76667		0	8.9	8.9		4.1		18.9	28.7	9.8		9.76667			35.6	44	8.4		8.7
LHR	47	40-60	S2D3R2 (N1)	31.8	41.4	9.6		3.4				11.6	22.5	10.9	2.1	19.4	29.4	10		3	8.4	16.4	8		7	9	18	9				9.3	18.6	9.3		3.7		9.1	18.9	9.8					7.1	16	8.9
LHR	48	40-60	S2D3R3 (N1)	19.8	29	9.2		3.8				22.5	33.4	10.9	2.1	29.4	39.5	10.1		2.9	16.4	25.4	9		6	11	20.9	9.9				27.4	37.6	10.2		2.8		39	48.7	9.7					16	24.8	8.8
LHR	49	0-20	S2D1R1 (N2)	32.4	42.5	10.1		2.9			10.8333	33.4	43.2	9.8	3.2	0	9.8	9.8		3.2	31.4	40.8	9.4		5.6	9.5	19.1	9.6		9.43333		11.2	21	9.8		3.2		8.9	18	9.1		9.13333			0	8.6	8.6		8.53333
LHR	50	0-20	S2D1R2 (N2)	0	11.6	11.6		1.4				0	10.5	10.5	2.5	9.8	19.5	9.7		3.3	29.6	38.4	8.8		6.2	27.6	36.8	9.2				20.9	31.5	10.6		2.4		0	9.1	9.1					9	17.8	8.8
LHR	51	0-20	S2D1R3 (N2)	0	10.8	10.8		2.2				10.5	20	9.5	3.5	19.5	28.2	8.7		4.3	38.4	47.2	8.8		6.2	0	9.5	9.5				8.9	18.7	9.8		3.2		34.7	43.9	9.2					17.8	26	8.2
LHR	52	20-40	S2D2R1 (N2)	10.8	19.4	8.6		4.4			9.06667	20	30.6	10.6	2.4	28.2	36.9	8.7		4.3	34.8	44.2	9.4		5.6	31.2	41	9.8		9.8		31.5	42.1	10.6		2.4		38.8	48.1	9.3		9.56667			26	34.4	8.4		8.5
LHR	53	20-40	S2D2R2 (N2)	19.4	28.6	9.2		3.8				30.6	40.2	9.6	3.4	36.9	46.2	9.3		3.7	0	11.9	11.9		3.1	20.9	31	10.1				0	11	11		2		29	38.8	9.8					34.4	43	8.6
LHR	54	20-40	S2D21R3 (N2)	28.6	38	9.4		3.6				40.2	50	9.8	3.2	0	9.4	9.4		3.6	25.4	34.8	9.4		5.6	18	27.5	9.5				0	11	11		2		9.9	19.5	9.6					0	8.5	8.5
LHR	55	40-60	S2D3R1 (N2)	38	48	10		3			10.9333	0	11.7	11.7	1.3	9.4	17.7	8.3		4.7	11.9	21.8	9.9		5.1	29.2	38.5	9.3		9.6		18.7	28.8	10.1		2.9		25.2	34.7	9.5		9.8			9	17.5	8.5		8.63333
LHR	56	40-60	S2D3R2 (N2)	0	11.1	11.1		1.9				11.7	21.5	9.8	3.2	17.7	27.7	10		3	17.8	26.4	8.6		6.4	0	10	10				28.8	39.9	11.1		1.9		19	29	10					17.5	26.3	8.8
LHR	57	40-60	S2D3R3 (N2)	0	11.7	11.7		1.3				21.5	31.9	10.4	2.6	27.7	36.1	8.4		4.6	21.9	31.4	9.5		5.5	36.8	46.3	9.5				30.2	41.1	10.9		2.1		0	9.9	9.9					26.5	35.1	8.6

## Sheet: CRepiration
				mg C-CO2 per kg soils
	Mean									SD
0-20 cm		1	3	7	15	21	28	35	45	1	3	7	15	21	28	35	45
	Control	363	836	1600	2100	2398	2755.5	3063	3261.5	1.13687e-13	22	38.5	66	7.19019e-13	38.5	50	121
	N1	324.5	803	1436	1900	2266	2543	2703.6	2905	70	110	143	80	150	60	150	44
LHR_D1	N2	280	434.5	869	1254	1601.5	1990	2251.6	2505	20	70	90	70	120	82.5	99	143
20-40 cm	Control	385	726	1000	1721.5	2200	2550	2785	2995	0	4.01944e-13	44	115.5	150	126.5	90	120
	N1	308	348.333	654.5	1315.3	1725.5	2221.6	2456.67	2750	40	51	80	90	80	200	250	250
LHR_D2	N2	270	517	720.5	1177	1509	1900	2200	2450	40	150	70	60	187	150	66	60
40-60 cm	Control	330	517	925	1356	1821	2260.5	2560.5	2836	11	22	11	88	22	82.5	170	150
	N1	324.5	489.5	665.5	1096.33	1474	1930.5	2222.9	2561	50	60	60	85	44	82.5	100	214.5
LHR_D3	N2	286	451	632.5	985	1215.5	1589.5	1900	2200	200	40	50	90	181.5	50	99	126.5
0-20 cm	Control	341	665.5	1237.5	1722	2100	2500	2800	2950	2.5737e-13	16.5	93.5	77	25.9272	89.9642	79.829	158.729
	N1	214.5	379.5	1045	1425	1672	1936	2136.5	2213	20	50	70	60	40	28	30	70
FSD_D1	N2	170.5	300	726	1204.5	1550	1721	1919.3	2016	40	56	90	50	10	60	50	40
20-40 cm	Control	325	638	819.5	1424.5	1875.5	2203	2536	2631	33	33	38.5	16.5	159.5	253	99	104.5
	N1	225.5	220	500	1136	1451	1747	1965	2011	20	40	60	80	50	40	50	50
FSD_D2	N2	159.5	253	426	763	965	1250	1420	1620	60	40	20	70	90	50	70	60
40-60 cm	Control	330	486	725	1100	1426	1700	2000	2300	11	16.5	27.5	88	66	22	44	110
	N1	286	319	600	1000	1300	1550	1750	1950	30	30	30	20	60	60	20	42.9
FSD_D3	N2	180.6	263	500	763	1096	1326	1526	1657	50	30	50	20	56	30	60	60
	1	3	7	15	21	28	35	45
N1 (0-20) LHR	38.5	33	164	200	132	212.5	359.4	356.5
N2 (0-20) LHR	83	401.5	731	846	796.5	765.5	811.4	756.5
N1 (20-40) LHR	77	377.667	345.5	406.2	474.5	328.4	328.333	245
N2 (20-40) LHR	115	209	279.5	544.5	691	650	585	545
N1 (40-60) LHR	5.5	27.5	259.5	259.667	347	330	337.6	275
N2 (40-60) LHR	44	66	292.5	371	605.5	671	660.5	636
N1 (0-20) FSD	126.5	286	192.5	297	428	564	663.5	737
N2 (0-20) FSD	170.5	365.5	511.5	517.5	550	779	880.7	934
N1 (20-40) FSD	99.5	418	319.5	288.5	424.5	456	571	620
N2 (20-40) FSD	165.5	385	393.5	661.5	910.5	953	1116	1011
N1 (40-60) FSD	44	167	125	100	126	150	250	350
N2 (40-60) FSD	149.4	223	225	337	330	374	474	643
0-20 cm Control	22	170.5	362.5	378	298	255.5	263	311.5
N1	110	423.5	391	475	594	607	567.1	692
N2	109.5	134.5	143	49.5	51.5	269	332.3	489
20-40 cm Control	60	88	180.5	297	324.5	347	249	364
N1	82.5	128.333	154.5	179.3	274.5	474.6	491.667	739
N2	110.5	264	294.5	414	544	650	780	830
0-20 cm Control	0	31	200	256	395	560.5	560.5	536
N1	38.5	170.5	65.5	96.3333	174	380.5	472.9	611
N2	105.4	188	132.5	222	119.5	263.5	374	543

## Sheet: ANOVA
Depth	Soil	Treat	Res
D1	S1	C	2950
D1	S1	C	3108.73
D1	S1	C	2791.27
D1	S2	C	3261.5				> setwd("D:/jobs	/In	terim_fi	le/N fer	tilizer	effect/St	ats/New data")
D1	S2	C	3382.5				> df=read.table(	"Re	s.txt",s	ep="\t",	dec="."	, header=	TRUE,na.strings=NA) # read data table
D1	S2	C	3140.5				> names(df)
D1	S1	N1	2213				[1] "Depth" "Soi	l"	"Treat"	"Res"
D1	S1	N1	2283				> class(df)
D1	S1	N1	2143				[1] "data.frame"
D1	S2	N1	2905				> fit <- aov(Res	~	Depth*So	il*Treat	, data=d	f)
D1	S2	N1	2949				> summary(fit)
D1	S2	N1	2861					Df	Sum Sq	Mean Sq	F value	Pr(>F)
D1	S1	N2	2016				Depth	2	1392686	696343	46.718	9.92e-11	***
D1	S1	N2	2056				Soil	1	4361390	4361390	292.608	< 2e-16	***
D1	S1	N2	1976				Treat	2	5154331	2577166	172.903	< 2e-16	***
D1	S2	N2	2505				Depth:Soil	2	48683	24341	1.633	0.20947
D1	S2	N2	2648				Depth:Treat	4	101152	25288	1.697	0.17218
D1	S2	N2	2362				Soil:Treat	2	190880	95440	6.403	0.00418	**
D2	S1	C	2631				Depth:Soil:Treat	4	106048	26512	1.779	0.15453
D2	S1	C	2735.5				Residuals	36	536588	14905
D2	S1	C	2526.5				---
D2	S2	C	2995				Signif. codes:	0 ‘	***’ 0.0	01 ‘**’	0.01 ‘*’	0.05 ‘.’	0.1 ‘ ’ 1
D2	S2	C	3115
D2	S2	C	2875
D2	S1	N1	2011
D2	S1	N1	2061
D2	S1	N1	1961
D2	S2	N1	2750
D2	S2	N1	3000
D2	S2	N1	2500
D2	S1	N2	1620
D2	S1	N2	1680
D2	S1	N2	1560
D2	S2	N2	2450
D2	S2	N2	2510
D2	S2	N2	2390
D3	S1	C	2300
D3	S1	C	2410
D3	S1	C	2190
D3	S2	C	2836
D3	S2	C	2986
D3	S2	C	2686
D3	S1	N1	1950
D3	S1	N1	1992.9
D3	S1	N1	1907.1
D3	S2	N1	2561
D3	S2	N1	2775.5
D3	S2	N1	2346.5
D3	S1	N2	1657
D3	S1	N2	1717
D3	S1	N2	1597
D3	S2	N2	2200
D3	S2	N2	2326.5
D3	S2	N2	2073.5
